# Supplementary material
Source: PubMed Central journal article supplement (PMC3023561)
Supplement: supp_D011106_jlr.D011106-1.pdf [file supp_D011106_jlr.D011106-1.pdf]

## SUPPLEMENTARY INFORMATION

### Site-Specific Analysis of Protein S-Acylation by Resin-Assisted Capture (Acyl-RAC)

M.T. Forrester et al.

Address correspondence to: Dr. Patrick J. Casey, Box 2612, Duke University Medical Center, Durham, NC 27710. Tel: 919-684-6933; Fax: 919-684-6998; E-mail: casey006@mc.duke.edu

#### Supplementary Methods

*Isolation of S-acylated peptides by Acyl-RAC and preparation for proteomic analysis –* Resins containing immobilized protein(s) from the application of Acyl-Rac were suspended in 1 ml of 50 mM NH<sub>4</sub>HCO<sub>3</sub> 1 mM EDTA containing 0.5 µg Trypsin Gold® (Promega) and rotated at 37 °C at 37 °C for 12 h. Samples were then “tagged” with the 114 or 117 amu iTRAQ reagents (reconstituted in 70 µl EtOH) in 0.2 ml sodium borate pH 8.5 for 8 h. Following washing with 5 x 1 ml 100 mM HEPES, 1.0 mM EDTA, 1.0% SDS and 5 x 1 ml 10 mM NH<sub>4</sub>HCO<sub>3</sub>, equal amounts of resin samples were combined and washed three times with 650 µl 50 mM NH<sub>4</sub>HCO<sub>3</sub>. The resin was then resuspended in 200 µl of 50 mM NH<sub>4</sub>HCO<sub>3</sub> containing 100 mM DTT and heated at 70° C for 30 min with shaking. Iodoacetamide was then added to a final concentration of 200 mM, and the suspension was incubated for 45 min at room temperature in the dark. The peptide mixture was processed using Proteospin® detergent removal kit (#23300, Norgen Biotek Corp.) per the manufacturer’s instructions, except that peptides were released from the resin using 5% aqueous ammonia. Peptides were dried under reduced pressure and resuspended in 20 µl 0.1% v/v TFA with 2% v/v CH<sub>3</sub>CN.

*LC-MS/MS Analysis –* Five µl of the sample was injected onto a 75 µm x 250 mm BEH C18 column (Waters) and separated using a 90 min gradient at a flow rate of 0.3 ml/min of 5 to

40% CH<sub>3</sub>CN containing 0.1% formic acid. The outlet of the liquid chromatography column was coupled to an LTQ-Orbitrap hybrid mass spectrometer (Thermo). The Orbitrap MS/MS method utilized HCD fragmentation for peptide identification and quantification using iTRAQ reporter ions, based on Thermo application note 445 ([http://www.thermo.com/eThermo/CMA/PDFs/Articles/articlesFile\\_9787.pdf](http://www.thermo.com/eThermo/CMA/PDFs/Articles/articlesFile_9787.pdf)). Briefly, the precursor scan method utilized profile mode and 60,000 resolution, with an automatic gain control (AGC) target of  $1 \times 10^6$  and 2 microscans. MS/MS acquisition was performed on the top 3 precursor ions above a 5000 count threshold using high energy collision-induced dissociation (HCD) with a 3 Da isolation window, normalized collision energy of 45%, and 2 microscans. Product ion spectra were collected in profile mode with a resolution of 7500 and AGC target setting of  $2 \times 10^5$ . Dynamic exclusion settings were repeat count = 3, repeat duration = 30 sec, exclusion list = 250, and exclusion time = 120 sec.

*Peptide Identification and Quantitation* – Mascot Distiller v2.3 (Matrix Science, Inc) was used to process raw Orbitrap LC-MSMS data, using standard parameters for high-resolution MS2 data except that deisotoping was turned off in the mass range from 112.5 to 121 m/z. Mascot generic (.mgf) files were searched on Mascot v2.2 (Matrix Sciences, Inc.), against Swissprot v57.10 database with human taxonomy ([www.expasy.org](http://www.expasy.org)). Search parameters were 10 ppm precursor and 0.02 Da product ion mass accuracy, with tryptic specificity and up to three missed cleavages. All samples were searched with iTRAQ4plex (K) and iTRAQ4plex (N-term) as fixed modifications and iTRAQ4plex (Y), Oxidation (M), and Carbamidomethyl (C) as variable modifications. Scaffold v2.6 Q+(Proteome Software Inc.) was used to validate MS/MS based peptide and protein identifications. Peptide identifications were accepted if they could be established at greater than 50.0% probability as specified by the Peptide Prophet algorithm.<sup>1</sup>

Peptide false-discovery rate (FDR) was determined to be 2.3% (2/88) by reverse database decoy search; after filtering for Cys-containing peptides, peptide FDR was 1.2% (1/84). Peptides were quantitated using the centroided reporter ion peak intensity, with the minimum peak height required for quantitation equal to 0.15% percent of the highest peak in the spectrum.

1. Keller, A.; Nesvizhskii, A. I.; Kolker, E.; Aebersold, R., Empirical statistical model to estimate the accuracy of peptide identifications made by MS/MS and database search. *Anal Chem* **2002**, 74, (20), 5383-92.

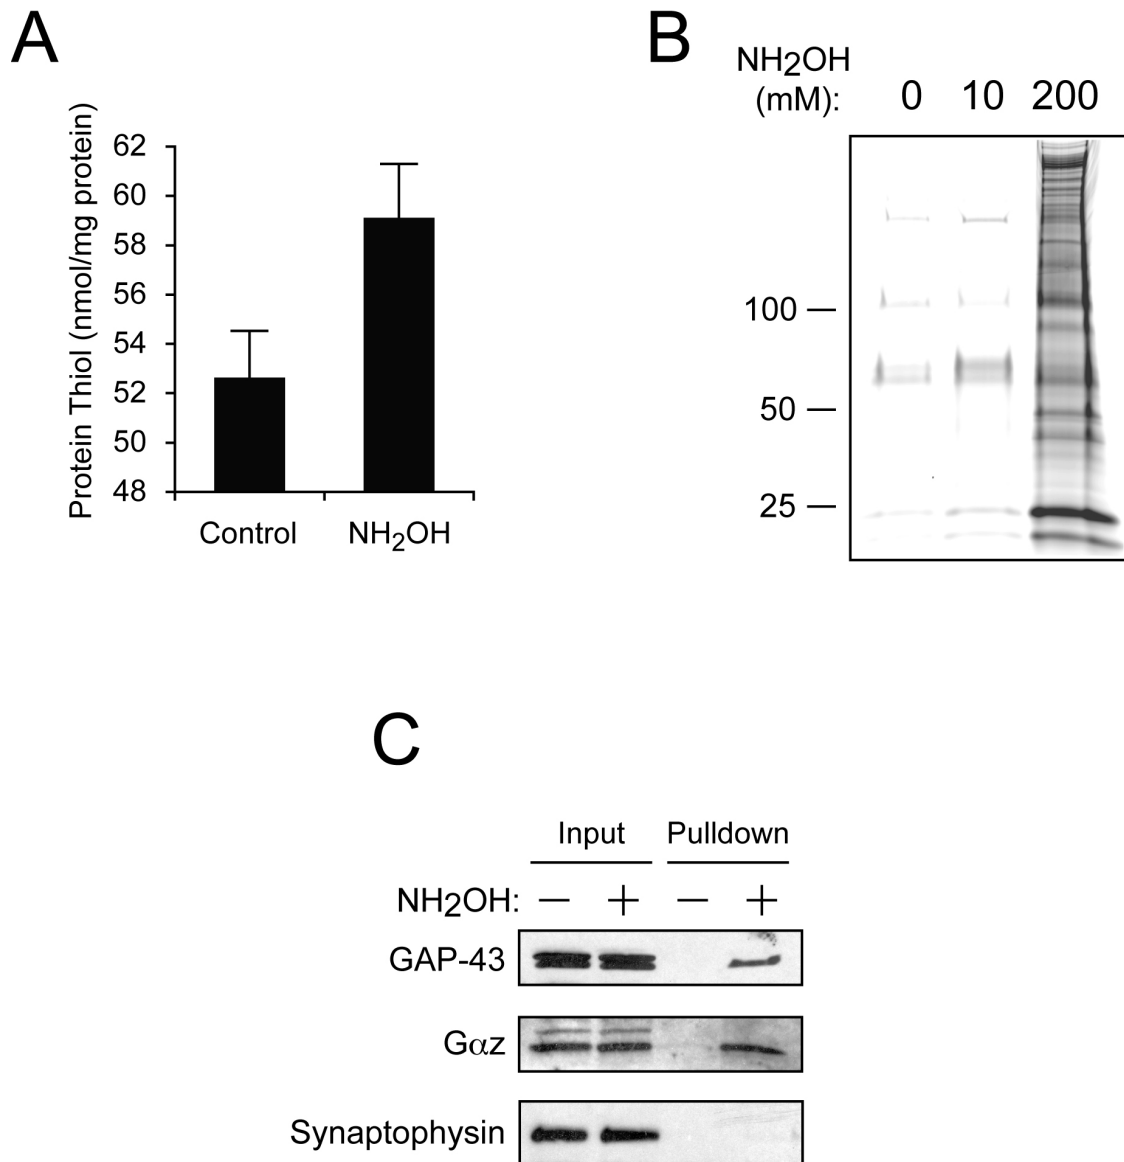

Supplementary Figure 1. Application of Acyl-RAC to detect *S*-acylation in purified bovine brain membranes. (A) Measurement of total thioester (*S*-acylation) by treating bovine membranes with either vehicle (control) or 200 mM NH<sub>2</sub>OH, followed by thiol quantitation via the DTNB assay. Endogenous *S*-acylation was detected via Acyl-RAC, with analysis by (B) Coomassie staining or (C) immunoblotting for Gαz and GAP-43 (two known *S*-acylated proteins present in brain membranes), as well as Synaptophysin (not known to undergo *S*-acylation).

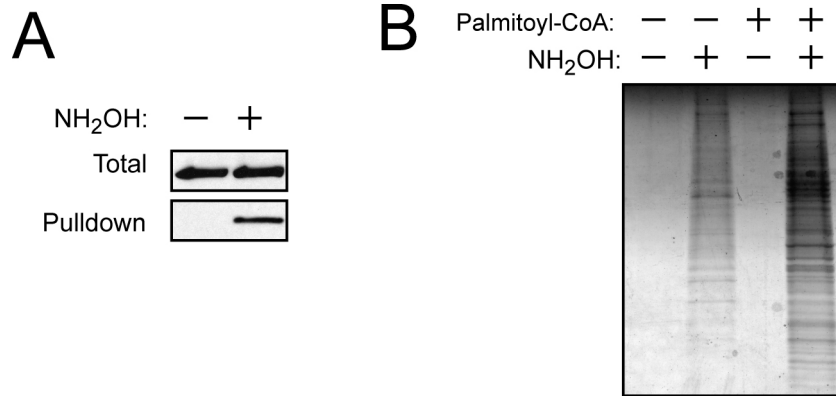

Supplementary Figure 2. Detection of endogenous *S*-acylation in cultured human cells. (A) Cultured T24 bladder carcinoma cells (2 x 10 cm dishes), processed in the absence (-) or presence (+) of 200 mM NH<sub>2</sub>OH, were subjected to Acyl-RAC with immunoblotting for endogenous H-Ras. (B) A membrane-enriched lysate from HEK293 cells was incubated with either buffer or 100 μM palmitoyl-CoA for 1 h at 37 °C, and subjected to Acyl-RAC with analysis by Coomassie staining.

Supplementary Table 1. LC-MS/MS identifications of *S*-acylation by Acyl-RAC. Listed are triplicate analyses, along with mass error and Mascot scores. As listed in the supplementary methods, the false discovery rate was 2.3% based on a decoy database search.

| Protein accession numbers | Peptide sequence        | Cys? | Times ID x/3 | Error (ppm) | Best Mascot Score |
|---------------------------|-------------------------|------|--------------|-------------|-------------------|
| ACADL_HUMAN               | AFVDNCLQLHEAK           | YES  | 3            | -0.12       | 50.1              |
| ACTBL_HUMAN               | CDVDIRK                 | YES  | 3            | 0.03        | 28.2              |
| AKAP1_HUMAN               | ADPAIKEPLPVEDVCPK       | YES  | 1            | 1.74        | 42.1              |
| ALDOA_HUMAN               | ALANSLACQGK             | YES  | 2            | 0.26        | 30.9              |
| AT1A1_HUMAN               | ACVVHGSDLK              | YES  | 2            | -0.72       | 44.1              |
| AT1A1_HUMAN               | KNCLVK                  | YES  | 3            | -1.35       | 28.5              |
| ATPG_HUMAN                | GLCGAIHSSIAK            | YES  | 3            | -2.15       | 35.7              |
| CCHL_HUMAN                | GCPVNTEPSGPTCEKK        | YES  | 3            | -0.43       | 57.6              |
| CD99_HUMAN                | LCFKENAEQGEVDMESHK      | YES  | 3            | -1.47       | 51.7              |
| CEPT1_HUMAN               | CGDHPESPVGFGHMSTTGCVLNK | YES  | 3            | -1.10       | 60.2              |
| CO4A1_HUMAN               | AHGQDLGTAGSCLRK         | YES  | 3            | -0.34       | 34.5              |
| CO4A1_HUMAN               | HSQTIDDPQCPSGTK         | YES  | 3            | 1.37        | 75                |
| CO4A2_HUMAN               | KFDVPCGGR               | YES  | 3            | 0.99        | 59.8              |
| CYC_HUMAN                 | CSQCHTVEK               | YES  | 3            | 1.98        | 40.2              |
| EFTU_HUMAN                | GDECELLGHSK             | YES  | 1            | -1.07       | 27.4              |
| EFTU_HUMAN                | KGDECELLGHSK            | YES  | 3            | -1.46       | 43.2              |
| ES1_HUMAN                 | NLSTFAVDGKDCK           | YES  | 2            | -1.05       | 34.2              |
| FAS_HUMAN                 | CPPGVVPACHNSK           | YES  | 3            | -1.23       | 40.7              |
| GNA11_HUMAN               | TLESMMACCLSDEVKESK      | YES  | 2            | -1.89       | 52.8              |
| GNAS2_HUMAN               | GCLGNSK                 | YES  | 3            | 1.06        | 54                |
| GNAS2_HUMAN               | GCLGNSKTEDQR            | YES  | 3            | -1.58       | 36.8              |
| GNAS2_HUMAN               | GCLGNSKTEDQRNEEK        | YES  | 3            | -1.45       | 37.6              |
| GRP75_HUMAN               | RTIAPCQK                | YES  | 3            | -0.20       | 28.9              |
| H2B1A_HUMAN               | QVHPDTGISSK             | NO   | 2            | 5.23        | 47.4              |
| HNRL1_HUMAN               | AIVICPTDEDLKDR          | YES  | 2            | -1.28       | 36.9              |
| HNRL1_HUMAN               | KAIVICPTDEDLKDR         | YES  | 3            | 0.06        | 57.7              |
| MBLC2_HUMAN               | AGICHK                  | YES  | 2            | 3.82        | 30.6              |
| MGST3_HUMAN               | SGLGSGPKCCH             | YES  | 3            | 0.57        | 47                |
| MPP6_HUMAN                | RDWDNSGPFPGTISSK        | YES  | 2            | -1.24       | 48.4              |
| NFXL1_HUMAN               | AGPECLHCEEKCSK          | YES  | 3            | 0.02        | 43.6              |
| NFXL1_HUMAN               | CGHLCPAPCHDQALIK        | YES  | 3            | -1.20       | 48.6              |
| NFXL1_HUMAN               | FCPCQK                  | YES  | 2            | -1.14       | 33.6              |
| NFXL1_HUMAN               | SCASPLWHCDQVCGK         | YES  | 3            | -1.21       | 54.9              |
| NFXL1_HUMAN               | TLPCGNHTCEQVCHVGACGECPR | YES  | 3            | -1.23       | 55.7              |
| ODPA_HUMAN                | KGGCAK                  | YES  | 3            | -2.74       | 33                |
| PARK7_HUMAN               | DVVICPDASLEDAKK         | YES  | 2            | -0.19       | 41.8              |
| PDIA1_HUMAN               | KEECPAVR                | YES  | 3            | -1.45       | 29.3              |

|             |                             |     |   |       |      |
|-------------|-----------------------------|-----|---|-------|------|
| PGAM5_HUMAN | HLPGVCK                     | YES | 3 | -1.77 | 33.7 |
| PSIP1_HUMAN | QPCSESDIITEEDKSK            | YES | 1 | 6.87  | 33.2 |
| PYR1_HUMAN  | GLPVTCEVAPHHLFLSHDDLER      | YES | 3 | -1.20 | 33.2 |
| PYR1_HUMAN  | SVHICHVAR                   | YES | 3 | 1.02  | 44.9 |
| RASH_HUMAN  | KLNPPDESGPGCMSCK            | YES | 3 | -2.53 | 36.8 |
| RELL1_HUMAN | CTTEAEQDIEEEKVEK            | YES | 2 | -2.13 | 33.1 |
| RL10A_HUMAN | FSVCLGDQQHCDEAK             | YES | 2 | -1.35 | 50.3 |
| RL15_HUMAN  | HCGALR                      | YES | 1 | 5.61  | 26.7 |
| RL7A_HUMAN  | TCTTVAFTQVNSEDKGALAK        | YES | 3 | -0.88 | 32.7 |
| RS11_HUMAN  | KCPFTGNVSIR                 | YES | 3 | -1.37 | 61.2 |
| RS16_HUMAN  | TATAVAHCK                   | YES | 1 | 2.85  | 28.7 |
| RS20_HUMAN  | KTPCGEGSK                   | YES | 3 | -2.21 | 56.3 |
| RS23_HUMAN  | ANPFGGASHAK                 | NO  | 2 | 5.04  | 25.1 |
| RS5_HUMAN   | KAQCPIVER                   | YES | 3 | -2.07 | 51.7 |
| S38A2_HUMAN | SSVTHLLCASK                 | YES | 2 | -0.81 | 29   |
| SC61B_HUMAN | KNASCGTR                    | YES | 3 | 0.15  | 47.4 |
| SND1_HUMAN  | RGEFCIAK                    | YES | 3 | -0.93 | 26.5 |
| SNP23_HUMAN | ETEKLTELNKCCGLCVPCNR        | YES | 3 | -0.89 | 37.3 |
| TIM50_HUMAN | VVVVDCKK                    | YES | 3 | -2.48 | 35.2 |
| TSN14_HUMAN | EKCGVPFSCCVDPDAQK           | YES | 2 | -2.00 | 34.3 |
| UBA1_HUMAN  | SIPICTLK                    | YES | 1 | 0.95  | 31   |
| ACADL_HUMAN | AFVDNCLQLHEAKR              | YES | 3 | -0.79 | 18.3 |
| AL3A2_HUMAN | HSFDTFSHQRPCLK              | YES | 2 | 0.83  | 10.7 |
| AT1A1_HUMAN | CSSILLHGK                   | YES | 1 | 9.16  | 16.8 |
| C1TM_HUMAN  | GDAHECFVSPVAK               | YES | 1 | 0.50  | 21.1 |
| CD151_HUMAN | VVPDSCCKTVVALCGQR           | YES | 1 | -0.14 | 22   |
| CD99_HUMAN  | KLCFK                       | YES | 1 | 1.10  | 14.7 |
| CD99_HUMAN  | KLCFKENAEQGEVDMESHR         | YES | 3 | -1.34 | 29.3 |
| EF1G_HUMAN  | KAAAPAPEEEMDECEQALAAEPK     | YES | 1 | 4.97  | 15.2 |
| ESTD_HUMAN  | QISSNKCFGLQK                | YES | 1 | 0.17  | 17.5 |
| ESYT1_HUMAN | GSSVDAPPRPCHTTPDSQFGTEHVLRL | YES | 2 | -0.68 | 17.1 |
| G3P_HUMAN   | AGAHLQGGAK                  | NO  | 3 | 4.34  | 24.5 |
| IF5A1_HUMAN | GRPCK                       | YES | 3 | 2.47  | 19.1 |
| KI67_HUMAN  | TTKIPCDSPQSDPVDTPSTK        | YES | 1 | -0.82 | 27.9 |
| MYO1D_HUMAN | KLCASDK                     | YES | 1 | 3.42  | 18   |
| NFXL1_HUMAN | CNCGNTK                     | YES | 1 | 0.50  | 16.2 |
| NFXL1_HUMAN | EFKPPCGHK                   | YES | 2 | 2.05  | 19.9 |
| PREP_HUMAN  | SQQSKPQDASCLPALK            | YES | 1 | -1.54 | 18.6 |
| RBP2_HUMA   | KCELSK                      | YES | 2 | 3.98  | 25   |
| RL10_HUMAN  | SCGKDGFIHR                  | YES | 2 | 5.13  | 17.2 |
| RL11_HUMAN  | RTGCIGAK                    | YES | 2 | 2.96  | 25.3 |
| RL3L_HUMAN  | KVACIGAWHPAR                | YES | 2 | 2.55  | 20.2 |
| RS30_HUMAN  | KVHGSLAR                    | NO  | 2 | 4.95  | 20.1 |
| RT18A_HUMAN | KITGLCQEEHR                 | YES | 1 | 2.54  | 20.5 |

|             |                        |     |   |       |      |
|-------------|------------------------|-----|---|-------|------|
| SF01_HUMAN  | CGGAGHIASDCK           | YES | 1 | 0.15  | 21   |
| SNP23_HUMAN | TLTELNKCCGLCVPCNR      | YES | 1 | -1.74 | 15.2 |
| SNP23_HUMAN | TTWGDGGENSPCNVSK       | YES | 1 | -0.57 | 17.9 |
| TBL2_HUMAN  | SGRPACQK               | YES | 2 | 3.47  | 22.5 |
| TLCD1_HUMAN | SDFCPEHVPK             | YES | 2 | -0.81 | 21.1 |
| TM9S2_HUMAN | ETCKLVCTK              | YES | 2 | 0.52  | 21.6 |
| ZN330_HUMAN | KCLSTHACACPLTDAECVECER | YES | 1 | 0.94  | 16.2 |
